# Supplementary material for: Synthesis, thermal characterization and local structure studies of Gd doped Th0.7U0.3O2 using X-ray absorption spectroscopy
Source: Royal Society of Chemistry journal article supplement (doi:10.1039/c6ra07621a), 2016-01-01
Supplement: c6ra07621a1.pdf [file c6ra07621a1.pdf]

**Supplementary Table 1. Coefficients of the second order polynomial equations ( $P_1$ ,  $P_2$ ,  $P_3$ ) and ( $Q_1$ ,  $Q_2$ ,  $Q_3$ ) used to fit the lattice parameter ‘ $a$ ’ and volume ‘ $v$ ’ against temperature T (K) for  $(\text{Th}_{0.7-x}\text{U}_{0.3}\text{Gd}_x)\text{O}_{2+y}$  oxides in the temperature range 298–1273 K.**

| Sample | $P_1$ | $P_2 (10^{-5})$ | $P_3(10^{-9})$ | $Q_1$  | $Q_2 (10^{-3})$ | $Q_3(10^{-7})$ |
|--------|-------|-----------------|----------------|--------|-----------------|----------------|
| TU     | 5.546 | 4.255           | 6.927          | 170.62 | 3.874           | 7.219          |
| TUG1   | 5.525 | 4.445           | 5.864          | 165.65 | 4.144           | 5.261          |
| TUG2   | 5.518 | 3.735           | 12.13          | 167.94 | 3.642           | 10.172         |
| TUG3   | 5.506 | 5.099           | 1.603          | 166.93 | 4.510           | 2.809          |

**Supplementary Table-2. Bond length, co-ordination number and disorder factor obtained from EXAFS fitting at Th  $L_3$  edge**

| Paths        | Parameters | TU     | TUG1   | TUG2   | TUG3   |
|--------------|------------|--------|--------|--------|--------|
| <b>Th-O</b>  | R (Å)      | 2.38   | 2.39   | 2.39   | 2.38   |
|              | N          | 8      | 7.07   | 8.33   | 6.4    |
|              | $\sigma^2$ | 0.0068 | 0.0050 | 0.0068 | 0.0026 |
| <b>Th-Th</b> | R (Å)      | 3.91   | 3.89   | 3.90   | 3.88   |
|              | N          | 12     | 10.6   | 12.50  | 9.60   |
|              | $\sigma^2$ | 0.0063 | 0.0052 | 0.0063 | 0.0042 |
| <b>Th-O</b>  | R (Å)      | 4.55   | 4.52   | 4.53   | 4.49   |
|              | N          | 24     | 21.22  | 25.0   | 19.2   |
|              | $\sigma^2$ | 0.0058 | 0.0074 | 0.0060 | 0.0086 |

**Supplementary Table-3. Bond length, co-ordination number and disorder factor obtained from EXAFS fitting at Gd L<sub>3</sub> edge**

| <b>Paths</b> | <b>Parameters</b> | <b>TUG1</b> | <b>TUG2</b> | <b>TUG3</b> |
|--------------|-------------------|-------------|-------------|-------------|
| <b>Gd-O</b>  | R (Å)             | 2.38        | 2.41        | 2.39        |
|              | N                 | 7.75        | 8.25        | 8.0         |
|              | $\sigma^2$        | 0.0045      | 0.0065      | 0.0097      |
| <hr/>        |                   |             |             |             |
| <b>Gd-Th</b> | R (Å)             | 3.86        | 3.73        | 3.89        |
|              | N                 | 12.38       | 13.2        | 12.38       |
|              | $\sigma^2$        | 0.0047      | 0.0112      | 0.0055      |
| <hr/>        |                   |             |             |             |
| <b>Gd-O</b>  | R (Å)             | 4.49        |             | 4.52        |
|              | N                 | 24.72       |             | 24.72       |
|              | $\sigma^2$        | 0.0049      |             | 0.0013      |
